# Supplementary material for: Genomic differences between nasal Staphylococcus aureus from hog slaughterhouse workers and their communities
Source: PLoS One. 2018 Mar 6;13(3):e0193820. doi: 10.1371/journal.pone.0193820 (PMC5839586; doi:10.1371/journal.pone.0193820)
Supplement: S1 Table — Plasmids are listed if available. (XLSX) [file pone.0193820.s006.xlsx]

## Sheet: Sheet1
S1 Table. Published S. aureus genomes included in this study. Plasmids are listed if available.
Strain (plasmid)	Host	Country	CC	ST	spa	MRSA	Remarks	GenBank accession no. of strain (plasmid)	Reference
MSSA476 (pSAS)	Human	UK	1	1	t607	No	CA-MSSA	BX571857 (BX571858)	[1]
MW2	Human	USA	1	1	t128	Yes	CA-MRSA	BA000033	[2]
502A (502A plasmid)	Human	USA	5	5	t010	No	MSSA	CP007454 (CP007455)	[3]
ECT-R 2 (pLUH01, pLUH02)	Human	Sweden	5	5	t002	No	MSSA	FR714927 (FR714928, FR714929)	[4]
ED98 (pT181, pAVX, pAVY)	Poultry	UK	5	5	t002	No	MSSA	CP001781 (CP001783, CP001784, CP001782)	[5]
Mu3	Human	Japan	5	5	t002	Yes	MRSA/Hetero-VISA	AP009324	[6]
Mu50 (VRSAp)	Human	Japan	5	5	t002	Yes	HA-MRSA/VISA	BA000017 (AP003367)	[7]
N315 (pN315)	Human	Japan	5	5	t002	Yes	HA-MRSA/VSSA	BA000018 (AP003139)	[7]
JH1 (pSJH101)	Human	USA	5	105	t002	Yes	MRSA/VSSA	CP000736 (CP000737)	[8]
JH9 (pSJH901)	Human	USA	5	105	t002	Yes	MRSA/VISA	CP000703 (CP000704)	[8]
USA300_FPR3757 (pUSA01, pUSA02, pUSA03)	Human	USA	8	8	t008	Yes	CA-MRSA	CP000255 (CP000256, CP000257, CP000258)	[9]
COL (pT181)	Human	UK	8	250	t008	Yes	MRSA	CP000046 (CP000045)	[10]
Newman	Human	UK	8	254	t008	No	MSSA	AP009351	[11]
MN8	Human	USA	30	30	t012	No	MSSA	CM000952	[12]
C160	Human	USA	30	34	t1057	No	MSSA	ACUV01000001-ACUV01000063	[13]
MRSA252	Human	UK	30	36	t018	Yes	HA-MRSA	BX571856	[1]
301-188	Human	USA	45	45	t038	Yes	MRSA	JASK01000001-JASK01000040	[14]
A9635	Human	USA	45	45	t004	No	MSSA	ACKI01000001-ACKI01000040	[15]
TCH130	Human	USA	72	72	t6509	No	MSSA	ACHD01000001-ACHD01000284	[16]
S0385 (pS0385-1, pS0385-2, pS0385-3)	Pig, Human	Netherlands	398	398	t011	Yes	MRSA	AM990992 (AM990993, AM990994, AM990995)	[17]
71193	Human	USA	398	398	t571	No	MSSA	CP003045	[18]
DR10	Human	Dominican Republic	398	398	t571	No	MSSA	AIDT01000001-AIDT01000044	[18]
1. Holden MT, Feil EJ, Lindsay JA, Peacock SJ, Day NP, Enright MC, et al. 2004. Proceedings of the National Academy of Sciences of the United States of America 101:9786-9791.
2. Baba T, Takeuchi F, Kuroda M, Yuzawa H, Aoki KI, Oguchi A, et al. 2002. Lancet 359:1819-1827.
3. Parker D, Narechania A, Sebra R, Deikus G, LaRussa S, Ryan C, et al. 2014. Genome Announcements 2: e00284-14.
4. Lindqvist M, Isaksson B, Grub C, Jonassen TØ, Hällgren A. 2012. European Journal of Clinical Microbiology & Infectious Diseases 31:141-147.
5. Lowder BV, Guinane CM, Zakour NLB, Weinert LA, Conway-Morris A, Cartwright RA, et al. 2009. Proceedings of the National Academy of Sciences of the United States of America 106:19545-19550.
6. Hiramatsu K, Aritaka N, Hanaki H, Kawasaki S, Hosoda Y, Hori S, et al. 1997. Lancet 350:1670-1673.
7. Kuroda M, Ohta T, Uchiyama I, Baba T, Yuzawa H, Kobayashi I, et al. 2001. Lancet 357:1225-1240.
8. Sieradzki K, Leski T, Dick J, Borio L, Tomasz A. 2003. Journal of Clinical Microbiology 41:1687-1693.
9. Diep BA, Gill SR, Chang RF, Phan TH, Chen JH, Davidson MG, et al. 2006. Lancet 367:731-739.
10. Gill SR, Fouts DE, Archer GL, Mongodin EF, DeBoy RT, Ravel J, et al. 2005. Journal of Bacteriology 187:2426-2438.
11. Baba T, Bae T, Schneewind O, Takeuchi F, Hiramatsu K. 2008. Journal of Bacteriology 190:300-310.
12. Schlievert PM, Blomster DA. 1983. The Journal of Infectious Diseases 147:236-242.
13. Thomas JC, Godfrey PA, Feldgarden M, Robinson DA. 2012. Journal of Bacteriology 194:2740-2741.
14. Hernandez D, Seidl K, Corvaglia AR, Bayer AS, Xiong YQ, François P. 2014. Genome Announcements 2:e00174-14.
15. Peleg AY, Monga D, Pillai S, Mylonakis E, Moellering Jr, RC, Eliopoulos GM. 2009. The Journal of Infectious Diseases 199:532-536.
16. McCarthy, AJ, Lindsay JA. 2010. BMC Microbiology 10:173.
17. Schijffelen MJ, Boel CE, van Strijp JA, Fluit AC. 2010. BMC Genomics 11:376.
18. Uhlemann AC, Porcella SF, Trivedi S, Sullivan SB, Hafer C, Kennedy AD, et al. 2012. mBio 3:e00027-12.
